# Supplementary material
Source: PubMed Central journal article supplement (PMC8669772)
Supplement: NIHMS1738216-supplement-1.pdf [file NIHMS1738216-supplement-1.pdf]

## **Supplemental Materials and Methods**

### **TCGA Analysis/ PECAN expression analysis**

Analysis of *SNAI2* expression across the TCGA database confirmed sarcoma tumors highly express *SNAI2* compared to other cancer types. Analysis of *SNAI2* expression in a different cohort of approximately 2000 pediatric cancers from the St. Jude-PeCan portal confirmed that *SNAI2* is highly expressed in RMS tumors and especially the ERMS sub-type compared to other pediatric cancers with osteosarcoma tumors expressing higher *SNAI2* (Supplemental Figure 1D).

### **SNAI1 CRISPR KO Cell Generation**

Cloning sgRNAs is previously described by Addgene lentiCRISPR v2 (<https://www.addgene.org/52961/>). After plating  $\sim 1.5 \times 10^6$  293T cells in 100mm plate, 9  $\mu\text{g}$  sgRNA SNAI1 lenti-CRISPR (see Supplemental Table 5)(54), 5  $\mu\text{g}$ , lentiviral 2nd Gen packaging plasmid (psPAX2) and 1  $\mu\text{g}$  envelope plasmid (pMD2G), DMEM basic media without serum to 1 ml total, and 40-45  $\mu\text{l}$  TansIt-LT1 transfection reagent ( $\sim 3:1$  ratio Transit-LT1/DNA) was added in a 1.5 mL tube, mixed, and incubated for 15-20 minutes at room temperature. Fresh DMEM 10% FBS media with no antibiotic was given 24h after initial plating, and 1 mL of prepared DNA complexes was added to different regions of the plate. After 48h, media was collected and filtered using a 0.45  $\mu\text{m}$  filter. Media was aspirated from target cells, and 3 mL of fresh media without antibiotics with 16-20  $\mu\text{g}/\text{mL}$  of protamine and 2-3 mL infecting media was added. Target cells were left to incubate for 48h at 37 °C. After 48h, virus-containing media was replaced with fresh media containing puromycin (12  $\mu\text{g}/\text{mL}$ ) and was incubated for an additional 72h. Cells were then characterized by PCR and western blot to confirm SNAI1 knockout.

### **Senescence Cell Histochemical Staining**

RMS cells were seeded into 6 well plates ( $0.1 - 0.5 \times 10^6$  cells/well) and radiated after 24h. Cells were fixed after 120h with 4% paraformaldehyde. Cells were then stained using the Senescence Cells Histochemical Staining Kit (Sigma Aldrich) according to the provided protocol. Cells were allowed to incubate with the stain at 37°C without

CO<sub>2</sub> until cells were stained blue (2 hours to overnight). Percentage of cells positive for  $\beta$ -galactosidase was assessed using ImageJ. Significance was determined using Student's t test.

### **Immunofluorescence Staining**

Immunofluorescence staining was performed similar to in Ignatius et. al., 2017 (27). Cells were plated at 4,000 cells/well (no IR) and 10,000 cells/well (receiving IR), grown in 10% FBS DMEM or RPMI growth media, fixed at 72 hpIR (0 or 15 Gy) in 4% paraformaldehyde/PBS, permeabilized in 0.5% Triton X-100/PBS, and incubated with rabbit anti-MEF2C (CST; Catalog No. 5030) and anti-myosin heavy chain (DSHB) in 1% BSA/PBS. Secondary antibody detection was performed with Alexa Fluor 488 goat anti-mouse and Alexa Fluor 594 goat anti-rabbit (Invitrogen). Cells were counterstained with DAPI (1:10,000) and imaged. Images were processed in ImageJ and Adobe Photoshop.

### **Supplemental References**

50. Shukla N, Ameer N, Yilmaz I, et al. Oncogene mutation profiling of pediatric solid tumors reveals significant subsets of embryonal rhabdomyosarcoma and neuroblastoma with mutated genes in growth signaling pathways. *Clin Cancer Res.* 2012;18(3):748-757. doi:10.1158/1078-0432.CCR-11-2056
51. McPake CR, Tillman DM, Poquette CA, George EO, Houghton JA, Harris LC. Bax is an important determinant of chemosensitivity in pediatric tumor cell lines independent of Bcl-2 expression and p53 status. *Oncol Res.* 1998;10(5):235-44.
52. Taylor AC, Shu L, Danks MK, et al. P53 mutation and MDM2 amplification frequency in pediatric rhabdomyosarcoma tumors and cell lines. *Med Pediatr Oncol.* Aug 2000;35(2):96-103. doi:10.1002/1096-911x(200008)35:2<96::aid-mpo2>3.0.co;2-z
53. Rokita JL, Rathi KS, Cardenas MF, et al. Genomic Profiling of Childhood Tumor Patient-Derived Xenograft Models to Enable Rational Clinical Trial Design. *Cell Rep.* Nov 5 2019;29(6):1675-1689 e9. doi:10.1016/j.celrep.2019.09.071

54. Haraguchi M, Sato M, Ozawa M. CRISPR/Cas9n-Mediated Deletion of the Snail 1 Gene (SNAI1) Reveals Its Role in Regulating Cell Morphology, Cell-Cell Interactions, and Gene Expression in Ovarian Cancer (RMG-1) Cells. *PLoS One*. 2015;10(7):e0132260. doi:10.1371/journal.pone.0132260
