# Supplementary material
Source: PubMed Central journal article supplement (PMC8669772)
Supplement: NIHMS1738216-supplement-3.pdf [file NIHMS1738216-supplement-3.pdf]

**Supplemental Table 1.**

| <b>REAGENT/RESOURCE</b>                 | <b>SOURCE</b>   | <b>IDENTIFIER</b>             |
|-----------------------------------------|-----------------|-------------------------------|
| Slug (C19G7)                            | CST             | Cat# 9585, RRID:AB 2239535    |
| SNAI1 (L70G2)                           | CST             | Cat# 3895s, RRID:AB 2191759   |
| TWIST1 (3E11)                           | Callbiochem     | Cat# DR1087, RRID:AB 10696455 |
| PUMA                                    | CST             | Cat# 4976, RRID:AB 2064551    |
| BIM (C34C5)                             | CST             | Cat# 2933, RRID:AB 1030947    |
| p53 (1C12)                              | CST             | Cat# 2524, RRID:AB 331743     |
| ZEB1 (D80D3)                            | CST             | Cat# 3396, RRID:AB 1904164    |
| phospho-CHEK1 (Ser345)                  | CST             | Cat# 2341, RRID:AB 330023     |
| CHEK1 (2G1D5)                           | CST             | Cat# 2360, RRID:AB 2080320    |
| phospho (Thr68) CHEK2                   | CST             | Cat# 2661, RRID:AB 331479     |
| CHEK2                                   | CST             | Cat# 2662, RRID:AB 2080793    |
| BAX                                     | CST             | Cat# 2772, RRID:AB 10695870   |
| BID (3C5)                               | CST             | Cat# 8762, RRID:AB 11217434   |
| BCL2 (124)                              | CST             | Cat# 15071, RRID:AB 2744528   |
| BCL-XL (54H6)                           | CST             | Cat# 2764, RRID:AB 2228008    |
| MCL-1 (D5V5L)                           | CST             | Cat# 39224, RRID:AB 2799149   |
| NOXA (114C307)                          | EMD             | Cat# OP180, RRID:AB 2268468   |
| BMF (E5U2J)                             | CST             | Cat# 50542, RRID:AB 2892182   |
| Flag                                    | Sigma           | Cat# F7425, RRID:AB 439687    |
| PARP                                    | CST             | Cat# 9542, RRID:AB 2160739    |
| Cleaved PARP (Asp214) (D64E10)          | CST             | Cat# 5625, RRID:AB 10699459   |
| p16 INK4A (D7C1M)                       | CST             | Cat# 80772, RRID:AB 2799960   |
| p21 Waf1/Cip1 (DCS60)                   | CST             | Cat# 2946, RRID:AB 2260325    |
| Histone $\gamma$ H2AX, phospho (Ser139) | Millipore       | Cat# 05-636, RRID:AB 309864   |
| $\alpha$ -Tubulin (DM1A)                | Abcam           | Cat# Ab7291, RRID:AB 2241126  |
| $\beta$ -Tubulin                        | Abcam           | Cat# Ab6046, RRID:AB 2210370  |
| HRP anti-rabbit                         | CST             | Cat# 7074, RRID:AB 2099233    |
| HRP anti-mouse                          | GE Healthcare   | Cat# NA93IV, RRID:AB 772210   |
| Ki67                                    | Biocare Medical | Cat# CRM325, RRID:AB 2721189  |
| Myogenin                                | Dako            | Cat# M3559, RRID:AB 2250893   |
| Myosin Heavy Chain (MF20)               | DSHB            | Cat# MF 20, RRID:AB 2147781   |
| MEF2C (D80C1)                           | CST             | Cat# 5030, RRID:AB 10548759   |
| Alexa Flour 488 goat anti-mouse         | Invitrogen      | Cat# A11029, RRID:AB 138404   |
| Alexa Fluor 594 goat anti-rabbit        | Invitrogen      | Cat# A11011, RRID:AB 143157   |

**Supplemental Table 2.**

| <b>OLIGONUCLEOTIDES</b> |                           |
|-------------------------|---------------------------|
| GAPDH Fwd               | GGTGGTCTCCTCTGACTTCAACA   |
| GAPDH Rev               | GTTGCTGTAGCCAAATTCGTTGT   |
| SNAI2_Fwd               | CAGACCCTGGTTGCTTCAA       |
| SNAI2_Reverse           | TGACCTGTCTGCAAATGCTC      |
| 23-Fwd hBIM             | TAAGTTCTGAGTGTGACCGAGA    |
| 118-Rev hBIM            | GCTCTGTCTGTAGGGAGGTAGG    |
| CDKN1A Forward          | TGTCCGTCAGAACCCATGC       |
| CDKN1A Reverse          | AAAGTCGAAGTCCATCGCTC      |
| 69-Fwd DAP              | AATGCGAATTGTGCAGAAACAC    |
| 149-Rev DAP             | GGGCTTTCCCATTCCTGGTC      |
| 661-Fwd FDXR            | CTGAGGCAGAGTCGAGTGAAG     |
| 745-Rev FDXR            | CCCGAAGCTCCTTAATGGTGA     |
| 492-Fwd F2R             | CGGCAGTGATTGGCAGTTTG      |
| 577-Rev F2R             | TGAGCAAGATAGAGGCGTACA     |
| 390-Fwd PDGFRB          | TGATGCCGAGGA ACTATTCATCT  |
| 492-Rev PDGFRB          | TTTCTTCTCGTGCAGTGTCAC     |
| 104-Fwd CLU             | CCAATCAGGGAAGTAAGTACGTC   |
| 204-Rev CLU             | CTTGCGCTCTTCGTTTGTTTT     |
| 183-Fwd IER3            | CAGCCGCAGGGTTCTCTAC       |
| 294-Rev IER3            | GATCTGGCAGAAGACGATGGT     |
| 576-Fwd TAP1            | CTGGGGAAGTCACCCTACC       |
| 662-Rev TAP1            | CAGAGGCTCCCGAGTTTGTG      |
| Hs_sgSnai1-1 top        | caccgAGAGCGCGGCATAGTGGTCG |
| Hs_sgSnai1-1 bottom     | aaacCGACCACTATGCCGCGCTCTc |
| Hs_sgSnai1-2 top        | caccgGCCTAACTACAGCGAGCTGC |
| Hs_sgSnai1-2 bottom     | aaacGCAGCTCGCTGTAGTTAGGCc |
| BCL2L11 p1 Fwd          | CACTTGGGTGGGGAGTTGTG      |
| BCL2L11 p1 Rev          | TTTGGGTGACCCCTTTGACC      |
| BCL2L11 p2 Fwd          | CAGCAGGGCAGCACTGTTTC      |
| BCL2L11 p2 Rev          | GCAGGGCACACATGGGTAAT      |
| NEG_CTL Fwd             | AGGGAGTTTTTATGAGCATTCCA   |
| NEG_CTL Rev             | AGCAGGTAAAGGTCCATATTCA    |

**Supplemental Table 3.**

| <b>RMS Cell Line</b> | <b>Oncogene</b>                                                     | <b>TP53 Status</b>                                    |
|----------------------|---------------------------------------------------------------------|-------------------------------------------------------|
| <b>ERMS</b>          |                                                                     |                                                       |
| RD                   | Q61H mutation of NRAS (50), 51-hyperdiploid, MYC amplification (22) | R248W mutation (35)                                   |
| Rh18                 | Amplification of MDM2 (22)                                          | Wild-type (51,52)                                     |
| JR-1                 | Near tetraploid (22), Q61L mutation of NRAS (Sanger sequencing)     | R248W mutation (52)                                   |
| Rh36                 | Q61K mutation of HRAS (53)                                          | Wild-type (52)                                        |
| SMS-CTR              | Q61K mutation of HRAS (50); Hypertriploid (22)                      | 4bp deletion at codons 219/220, ΔNt 1236-1239 (35,52) |
| <b>ARMS</b>          |                                                                     |                                                       |
| Rh30                 | PAX3-FOXO1 fusion (22)                                              | R273C mutation; heterozygous (51,52)                  |
| Rh41                 | t(2;13) (22)                                                        | ΔNt 1001 – 1013 (52)                                  |
| Rh28                 | Near tetraploid (22)                                                | Wild-type (52)                                        |

**Supplemental Table 4. Correlation between *SNAI2* and pro-apoptotic genes in RMS.**

| Gene           | Alternatively spliced Transcript ID | Pearson Correlation | P-value  | Protein (Amino acid) | Uniprot family and/or domains | Significance |
|----------------|-------------------------------------|---------------------|----------|----------------------|-------------------------------|--------------|
| <i>BCL2L11</i> | ENST00000438054                     | -0.321              | 0.000139 | 96                   | BIM                           | ***          |
| <i>BCL2L11</i> | ENST00000308659                     | -0.148              | 0.084985 | 138                  | BH3                           |              |
| <i>BCL2L11</i> | ENST00000393252                     | -0.052              | 0.551543 | 71                   | BIM                           |              |
| <i>BCL2L11</i> | ENST00000405953                     | -0.047              | 0.585795 | 112                  | BH3                           |              |
| <i>BCL2L11</i> | ENST00000432179                     | 0.109               | 0.207174 | 122                  | BIM                           |              |
| <i>BCL2L11</i> | ENST00000337565                     | 0.128               | 0.136278 | 112                  | BH3                           |              |
| <i>BCL2L11</i> | ENST00000393256                     | 0.212               | 0.013071 | 198                  | BH3                           | *            |
| <i>BMF</i>     | ENST00000561360                     | -0.052              | 0.549257 | 184                  | BH3                           |              |
| <i>BMF</i>     | ENST00000561282                     | 0.028               | 0.748620 | 184                  | BH3                           |              |
| <i>BMF</i>     | ENST00000559701                     | 0.044               | 0.613513 | 129                  | BH3                           |              |
| <i>BMF</i>     | ENST00000431415                     | 0.064               | 0.458153 | 163                  | BH3                           |              |
| <i>BMF</i>     | ENST00000557870                     | 0.095               | 0.272875 | 61                   | BMF                           |              |
| <i>BMF</i>     | ENST00000354670                     | 0.166               | 0.053532 | 184                  | BH3                           |              |
| <i>BMF</i>     | ENST00000558774                     | 0.170               | 0.047850 | 129                  | BH3                           | *            |
| <i>BMF</i>     | ENST00000560430                     | 0.192               | 0.025198 | 13                   | none                          | *            |
| <i>BMF</i>     | ENST00000397573                     | 0.216               | 0.011625 | 184                  | BH3                           | *            |
| <i>BBC3</i>    | ENST00000300880                     | -0.053              | 0.541170 | 101                  | BBC3                          |              |
| <i>BBC3</i>    | ENST00000449228                     | 0.108               | 0.209177 | 261                  | BBC3                          |              |
| <i>BBC3</i>    | ENST00000439096                     | 0.212               | 0.013187 | 193                  | BH3                           | *            |
| <i>BBC3</i>    | ENST00000341983                     | 0.213               | 0.012902 | 131                  | BH3                           | *            |
| <i>BAX</i>     | ENST00000391871                     | 0.055               | 0.521069 | 175                  | BAX                           |              |
| <i>BAX</i>     | ENST00000539787                     | 0.060               | 0.488773 | 140                  | BAX                           |              |
| <i>BAX</i>     | ENST00000354470                     | 0.139               | 0.107790 | 143                  | BH3, BH1, BH2                 |              |
| <i>BAX</i>     | ENST00000415969                     | 0.165               | 0.054501 | 179                  | BH3, BH1, BH2                 |              |
| <i>BAX</i>     | ENST00000293288                     | 0.185               | 0.031002 | 218                  | BH3, BH1, BH2                 | *            |
| <i>BAX</i>     | ENST00000345358                     | 0.214               | 0.012513 | 192                  | BH3, BH1, BH2                 | *            |
| <i>BAX</i>     | ENST00000506183                     | 0.248               | 0.003534 | 126                  | BAX                           | **           |
| <i>BAD</i>     | ENST00000544785                     | -0.119              | 0.166228 | 157                  | BAD                           |              |
| <i>BAD</i>     | ENST00000493798                     | 0.016               | 0.854734 | 64                   | BAD                           |              |
| <i>BAD</i>     | ENST00000394531                     | 0.063               | 0.466894 | 163                  | BAD                           |              |
| <i>BAD</i>     | ENST00000492141                     | 0.089               | 0.303797 | 51                   | BAD                           |              |
| <i>BAD</i>     | ENST00000394532                     | 0.133               | 0.121317 | 168                  | BAD                           |              |
| <i>BAD</i>     | ENST00000309032                     | 0.253               | 0.002998 | 168                  | BAD                           | **           |
| <i>HRK</i>     | ENST00000257572                     | 0.100               | 0.248959 | 91                   | BH3                           |              |
| <i>HRK</i>     | ENST00000550505                     | 0.102               | 0.237747 | 18                   | none                          |              |
| <i>BID</i>     | ENST00000342111                     | -0.137              | 0.112815 | 137                  | BH3                           |              |
| <i>BID</i>     | ENST00000317361                     | -0.112              | 0.196201 | 241                  | BH3                           |              |
| <i>BID</i>     | ENST00000551952                     | -0.013              | 0.880903 | 195                  | BH3                           |              |
| <i>BID</i>     | ENST00000399767                     | 0.065               | 0.454731 | 99                   | BH3                           |              |
| <i>BID</i>     | ENST00000399765                     | 0.183               | 0.033199 | 99                   | BH3                           | *            |
| <i>PMAIP1</i>  | ENST00000316660                     | -0.190              | 0.026852 | 54                   | BH3                           | *            |
| <i>PMAIP1</i>  | ENST00000269518                     | -0.186              | 0.030234 | 136                  | BH3                           | *            |

\*p<0.05, \*\*p<0.005, \*\*\*p<0.0005

|                                                                                    |                                                         |
|------------------------------------------------------------------------------------|---------------------------------------------------------|
|  | Blue: Positively Correlated, Red: Negatively Correlated |
|  | Significance <0.05                                      |

**Supplemental Table 5. Correlation between *SNAI2* and anti-apoptotic genes in RMS.**

| Gene          | Alternatively spliced Transcript ID | Pearson Correlation | P-value  | Protein (Amino acid) | Uniprot family and/or domains | Significance |
|---------------|-------------------------------------|---------------------|----------|----------------------|-------------------------------|--------------|
| <i>BCL2</i>   | ENST00000333681                     | -0.393              | 0.000002 | 239                  | BH4, BH3, BH1, BH2            | ***          |
| <i>BCL2</i>   | ENST00000590515                     | -0.130              | 0.130980 | 46                   | none                          |              |
| <i>BCL2</i>   | ENST00000398117                     | -0.025              | 0.771852 | 239                  | BH4, BH3, BH1, BH2            |              |
| <i>BCL2</i>   | ENST00000589955                     | 0.061               | 0.482746 | 205                  | BH4, BH3, BH1, BH2            |              |
| <i>BCL2L1</i> | ENST00000434194                     | -0.246              | 0.003938 | 233                  | BH4                           | **           |
| <i>BCL2L1</i> | ENST00000439267                     | -0.174              | 0.043232 | 233                  | BH4                           | *            |
| <i>BCL2L1</i> | ENST00000422920                     | -0.104              | 0.227766 | 170                  | BH4                           |              |
| <i>BCL2L1</i> | ENST00000450273                     | -0.095              | 0.272018 | 307                  | BH4                           |              |
| <i>BCL2L1</i> | ENST00000307677                     | -0.078              | 0.367356 | 233                  | BH4, BH3, BH1, BH2            |              |
| <i>BCL2L1</i> | ENST00000376062                     | -0.072              | 0.406773 | 233                  | BH4, BH3, BH1, BH2            |              |
| <i>BCL2L1</i> | ENST00000456404                     | -0.065              | 0.453711 | 233                  | BH4                           |              |
| <i>BCL2L1</i> | ENST00000420488                     | -0.034              | 0.694000 | 233                  | BH4                           |              |
| <i>BCL2L1</i> | ENST00000376055                     | 0.070               | 0.418254 | 170                  | BH4, BH3, BH1, BH2            |              |
| <i>MCL1</i>   | ENST00000307940                     | 0.121694088         | 0.158145 | 271                  | BH3, BH1, BH2                 |              |
| <i>MCL1</i>   | ENST00000369026                     | 0.262012971         | 0.002060 | 350                  | BH3, BH1, BH2                 | **           |

\*p<0.05, \*\*p<0.005, \*\*\*p<0.0005

|                                                                                   |                                                         |
|-----------------------------------------------------------------------------------|---------------------------------------------------------|
|   | Blue: Positively Correlated, Red: Negatively Correlated |
|  | Significance <0.05                                      |
